# Supplementary material
Source: PubMed Central journal article supplement (PMC545845)

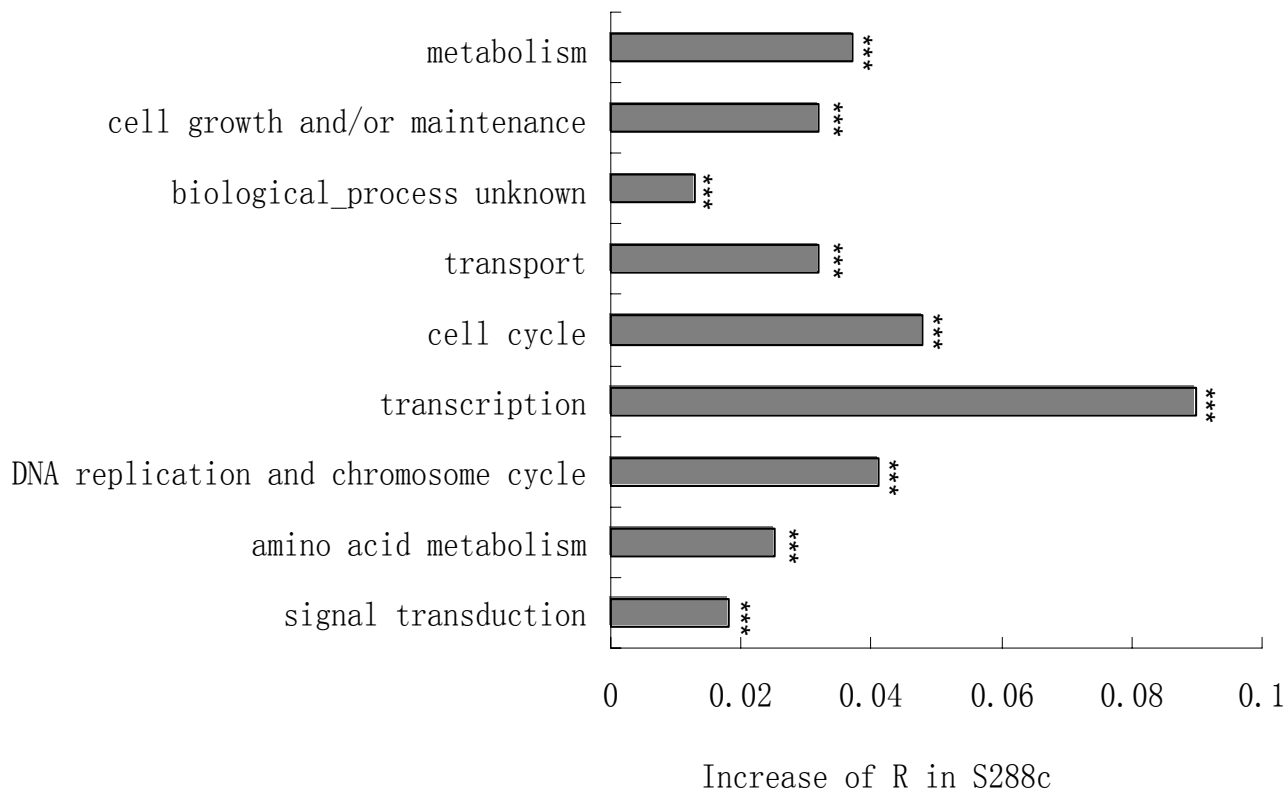

Supplement: pnas_102_4_1092__1.pdf [file pnas_102_4_1092__1.pdf]

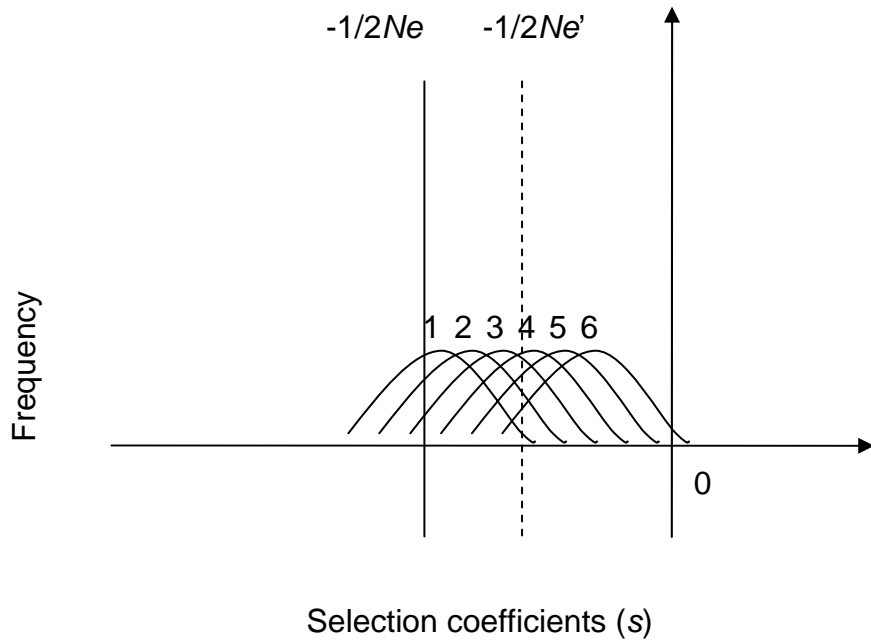

Supplement: pnas_102_4_1092__2.pdf [file pnas_102_4_1092__2.pdf]
